# Supplementary material for: Integration of capillary vibrating sharp-edge spray ionization as a nebulization device for ICP-MS
Source: Royal Society of Chemistry journal article supplement (doi:10.1039/d2ja00384h), 2023-01-01
Supplement: d2ja00384h1.pdf [file d2ja00384h1.pdf]

## Supplementary Information for Integration of Capillary Vibrating Sharp-Edge Spray Ionization as a Nebulization Device for ICP-MS

Tristen L. Taylor<sup>1</sup> and Alexander Gundlach-Graham<sup>1</sup>

Iowa State University, Department of Chemistry

Address correspondence to alexgg@iastate.edu

### Contents

|                                                                                    |   |
|------------------------------------------------------------------------------------|---|
| Table 1: ICP-TOFMS and cVSSI tuning parameters. ....                               | 2 |
| Figure S1: Image of cVSSI nebulization device. ....                                | 3 |
| Figure S2: Image of cVSSI sample introduction system on ICP-TOFMS instrument. .... | 4 |
| Droplet Sizing Procedure .....                                                     | 5 |
| Figure S3: Microscope image of aerosol droplets .....                              | 5 |
| Figure S4: (A-J) Droplet size distributions. ....                                  | 6 |
| Figure S5: Signal stability at different voltages. ....                            | 7 |
| Figure S6: Multi-element calibration curve. ....                                   | 8 |
| Figure S7: Noise power spectra created for long term stability acquisition. ....   | 9 |

Table 1: ICP-TOFMS and cVSSI tuning parameters.

| <b>Experiment</b>                              | <b>Flow Rate Study (Fig. 3)</b> | <b>Input Study Device 1 (Fig. 4)</b> | <b>Input Study Device 2 (Fig. S5)</b> | <b>Calibration (Fig. S6)</b> | <b>Long Term Stability (Fig. 5)</b> |
|------------------------------------------------|---------------------------------|--------------------------------------|---------------------------------------|------------------------------|-------------------------------------|
| <b>Nebulization Conditions</b>                 |                                 |                                      |                                       |                              |                                     |
| F <sub>piezo</sub> (kHz)                       | 95.45                           | 94.9-95.5                            | 96.96                                 | 96.2                         | 95.2                                |
| V <sub>piezo</sub> (V <sub>p-p</sub> )         | 24.75                           | 19.80-26.40                          | 14.19/23.76                           | 24.75                        | 24.75                               |
| Sample Flow Rate (μL/min)                      | 5-50                            | 15                                   | 15                                    | 15                           | 15                                  |
| <b>ICP-MS Conditions</b>                       |                                 |                                      |                                       |                              |                                     |
| Carrier Gas Flow (L/min)                       | 0.120                           | 0.115                                | 0.184                                 | 0.144                        | 0.115                               |
| Curtain Gas Flow (L/min)                       | 0.79                            | 0.82                                 | 0.738                                 | 0.89                         | 0.82                                |
| Auxiliary Flow (L/min)                         | 1.03                            | 1.03                                 | 1.19                                  | 1.03                         | 1.03                                |
| Cool Flow (L/min)                              | 13.8                            | 13.8                                 | 14.7                                  | 13.8                         | 13.8                                |
| Injector Diameter (mm)                         | 1.5                             | 1.5                                  | 1.5                                   | 1.5                          | 1.5                                 |
| Sampling Depth (mm)                            | 5.90                            | 6.06                                 | 6.32                                  | 6.04                         | 6.06                                |
| Plasma Power (W)                               | 1550                            | 1550                                 | 1500                                  | 1550                         | 1550                                |
| Collision Cell Gas H <sub>2</sub> (mL/min)     | 4.8                             | 6.2                                  | 4.1                                   | 6.0                          | 6.2                                 |
| Notched m/z                                    | 17.2, 30.95, 37.89, 39          | 17.2, 30, 37.85, 39                  | 18.4, 20.5, 31, 38                    | 17.2, 31, 37.85, 39          | 17.2, 31, 37.85, 39                 |
| Mass-Spectral Averaging Period (ms / spectrum) | 1.20                            | 300                                  | 300                                   | 300                          | 300                                 |

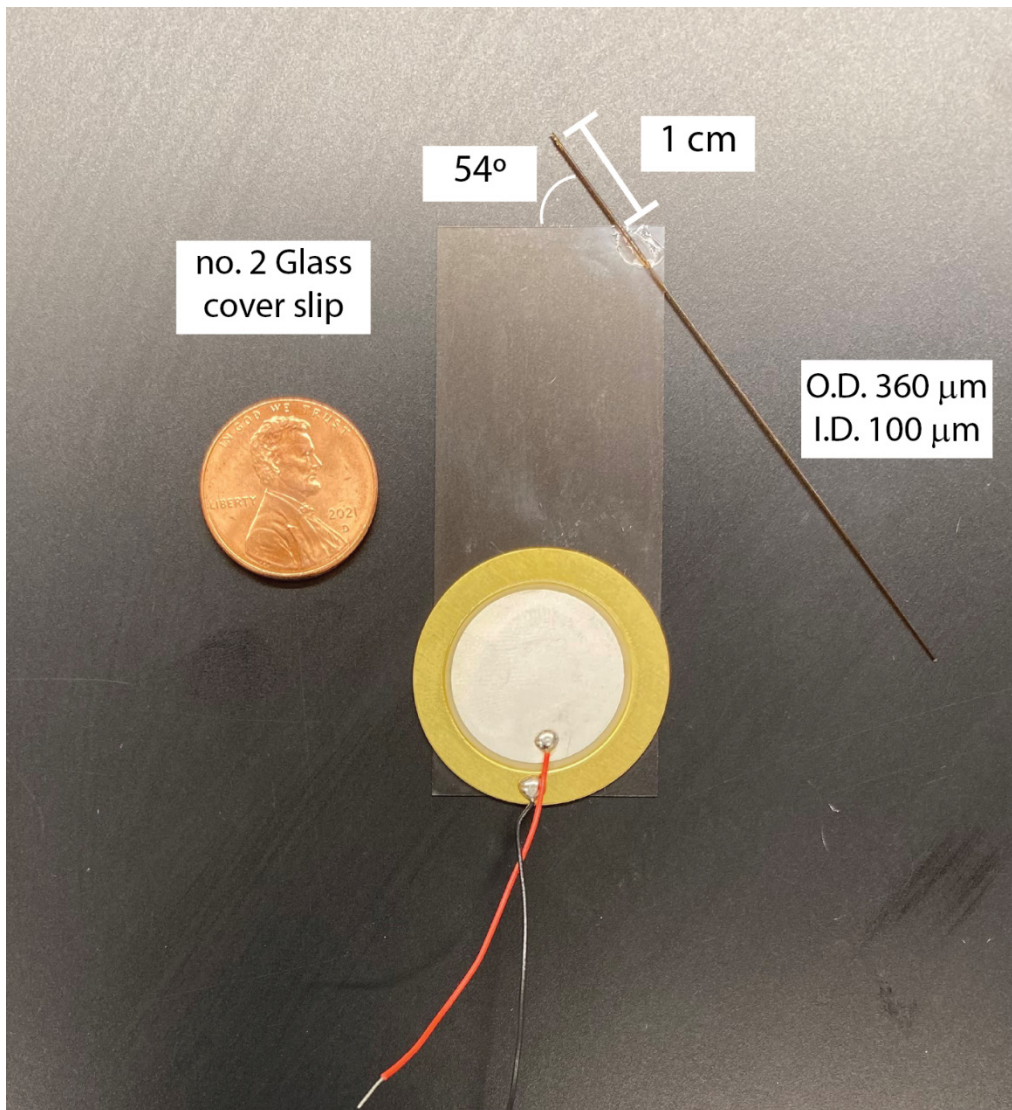

Figure S1: Image of cVSSI nebulization device with optimized geometry. USA penny is added for scale.

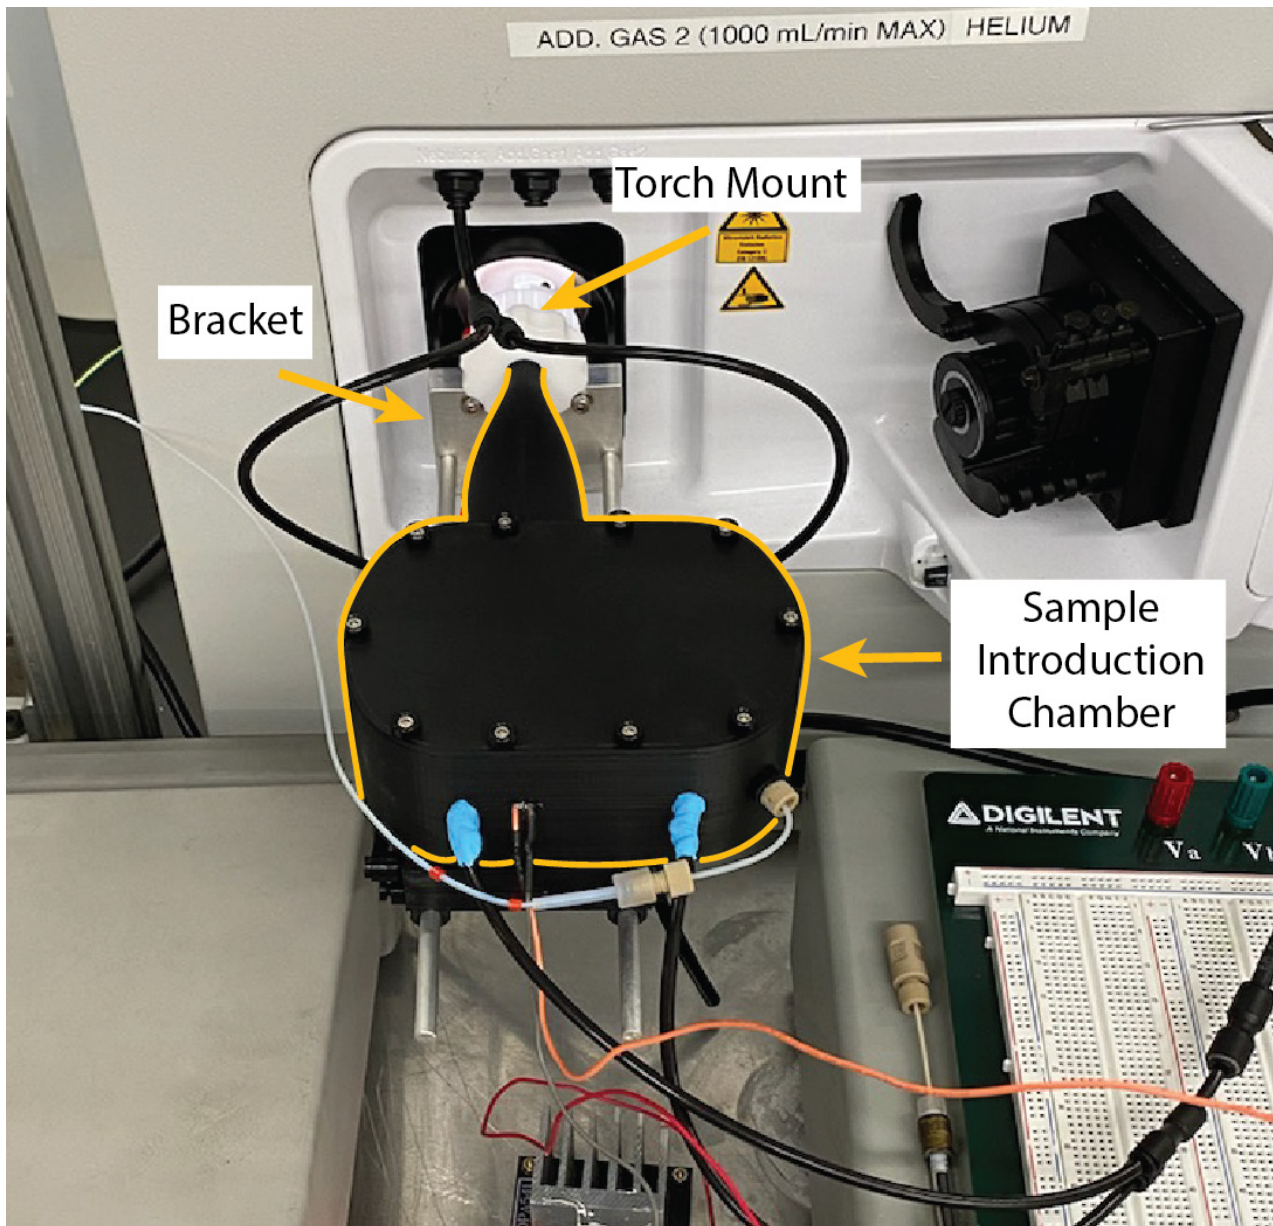

Figure S2: Image of cVSSI sample introduction system on ICP-TOFMS instrument.

## Droplet Sizing Procedure

Droplets were sized using immersive sampling.<sup>1</sup> The sample solution was dyed with black water-based ink (Waterman Paris, Paris, France). A petri dish was filled with mineral spirits, and sample solution was nebulized at  $f_{\text{piezo}}=96.5$  kHz and  $V_{\text{piezo}}=24.75$  V. The outlet of the cVSSI capillary was held about 1 cm above the surface of the immersion fluid (mineral spirits) to collect nebulized droplets. Pictures of the droplets were taken on a Nikon Multizoom AZ1000 bright field microscope (Nikon Instrument Inc., Melville, NY, USA) at 40x magnification. A USAF1951 positive test target (ThorLabs, Newton, NJ, USA) was used for microscope scale calibration, and droplet diameters were found using ImageJ (US National Institutes of Health, Bethesda, MD, USA) with the ParticleSizer plugin.<sup>2</sup> All droplets with aspect ratios of 1.1 and greater were excluded from sizing. This process was carried out for droplets collected at flow rates from 5-50  $\mu\text{L}/\text{min}$ .

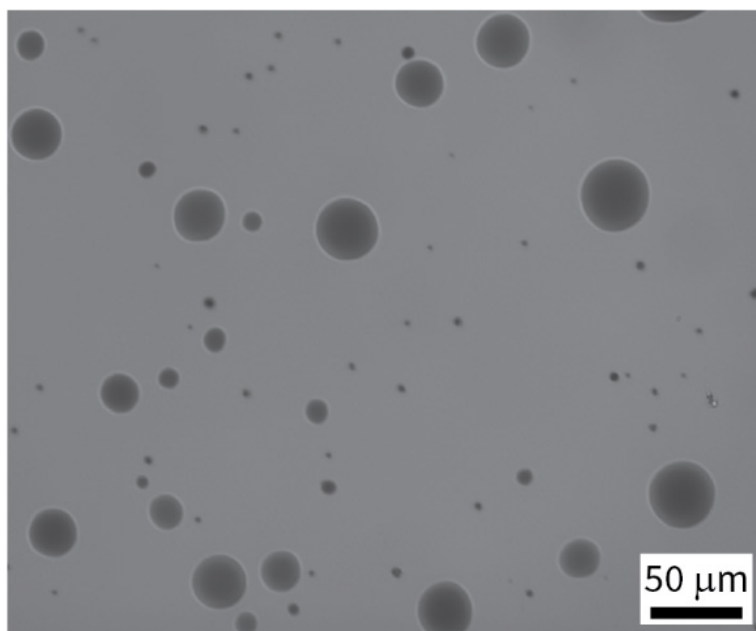

Figure S3: Microscope image (40x magnification) of droplets after immersive sampling. cVSSI conditions: liquid flow rate of 15  $\mu\text{L}/\text{min}$ ,  $f_{\text{piezo}}=96.5$  kHz, and  $V_{\text{piezo}}=24.75$

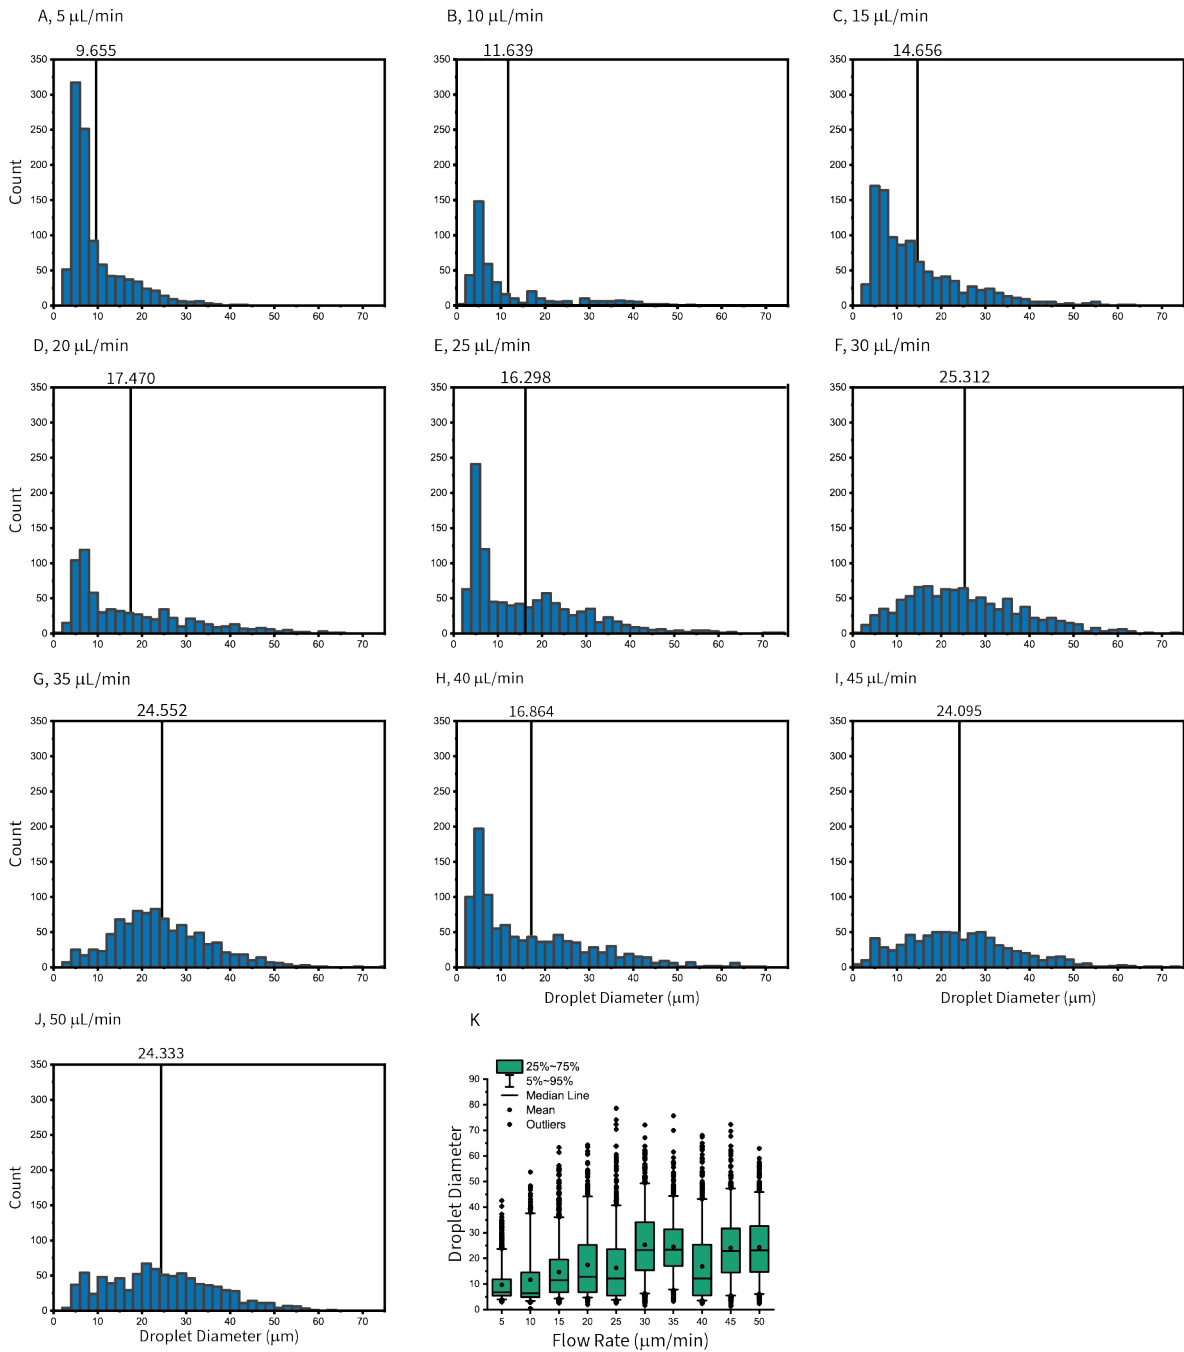

Figure S4: (A-J) Droplet size distributions across flow rates from 5-50  $\mu\text{L}/\text{min}$ . Vertical lines indicate the mean droplet size. (K) Box and whisker plots comparing droplet size distributions at all flow rates.

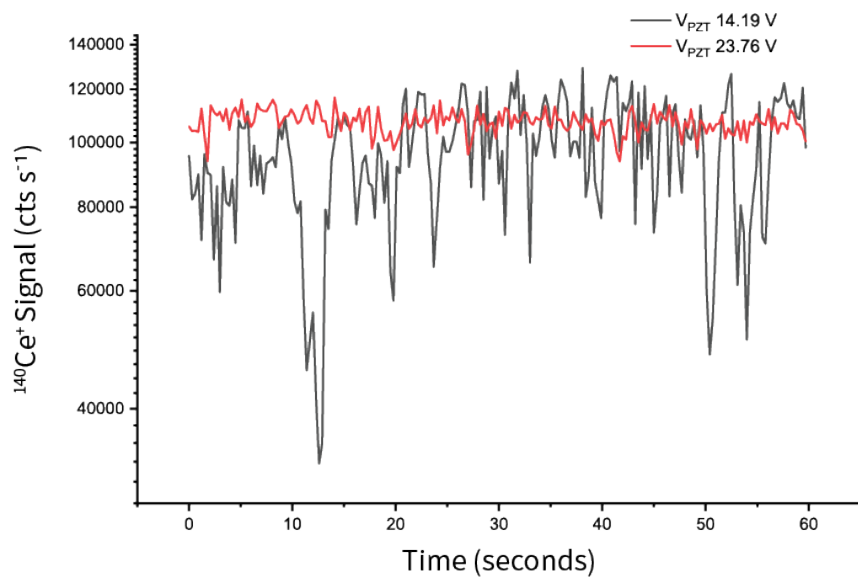

Figure S5: Time traces collected for  $^{140}\text{Ce}^+$  at two different voltage inputs. The relative standard deviation (RSD) at  $V_{\text{piezo}}=14.19$   $V_{\text{p-p}}$  was 20.32% and at  $V_{\text{piezo}}=23.76$   $V_{\text{p-p}}$  the RSD measured was 4.02%.  $f_{\text{piezo}}=96.96$  kHz for both measurements. Transport gases were also held constant for both acquisitions.

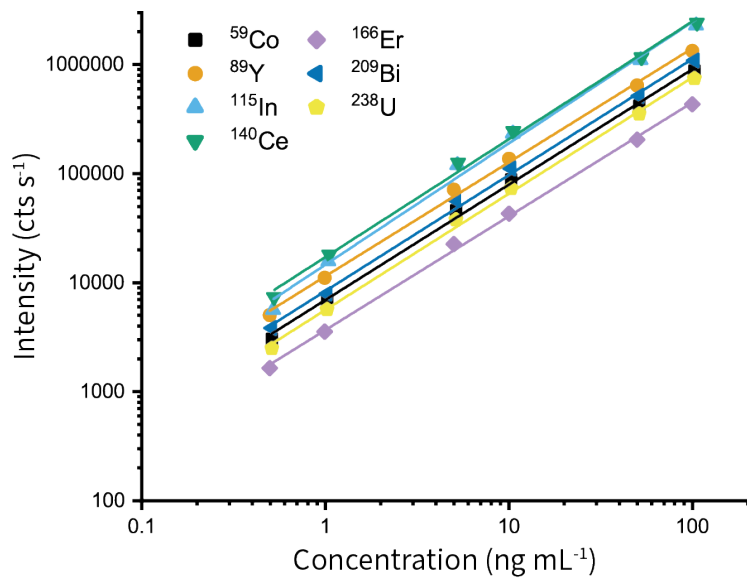

Figure S6: Multi-element calibration curve collected with cVSSI sample introduction system. Average RSD is 16%.



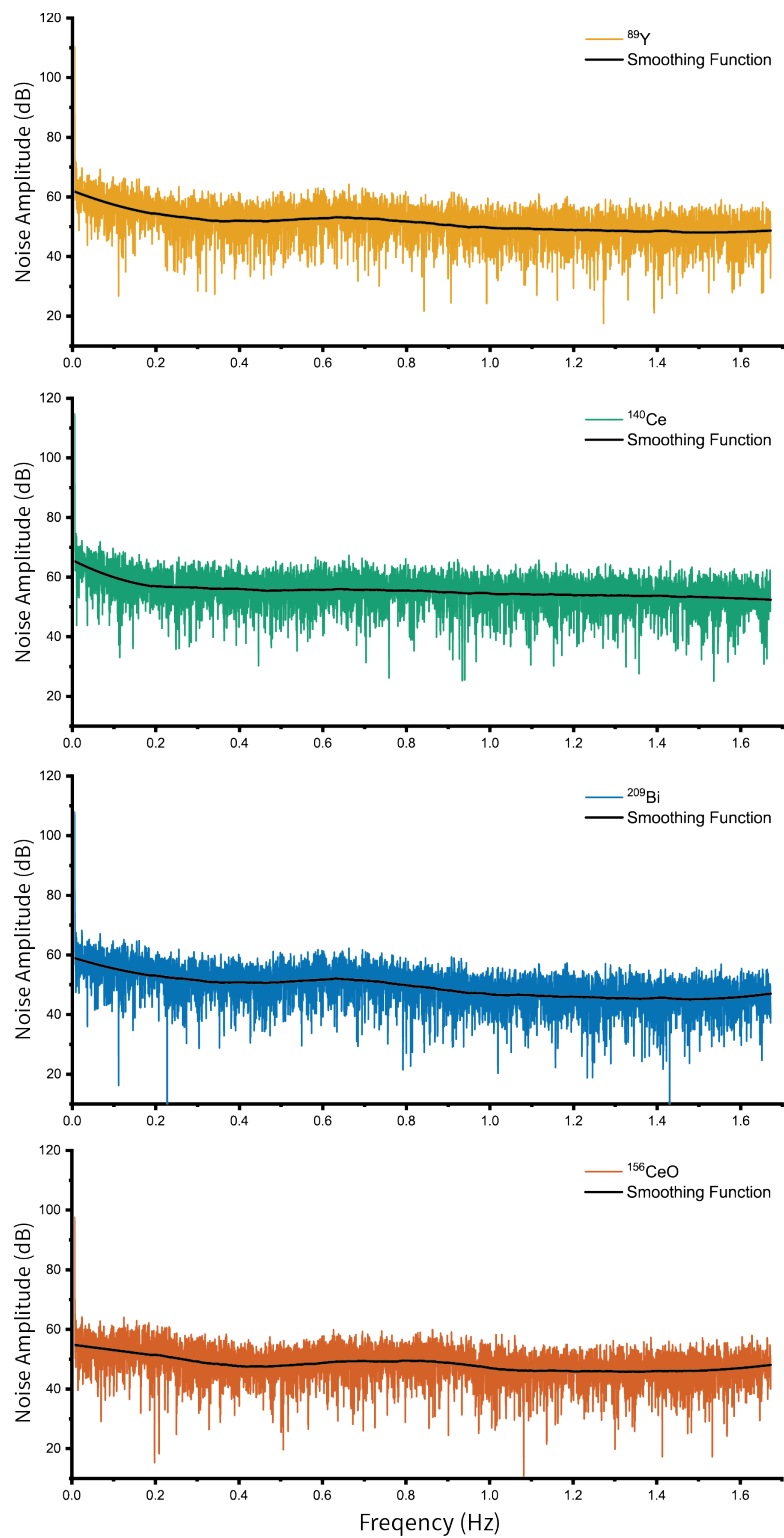

Figure S7: Noise power spectra created from long term stability acquisition. Savitzky-Golay smoothing function shown in black.

## Citations

1. J. H. Rupe, *Symposium on Combustion and Flame, and Explosion Phenomena*, 1948, **3**, 680-694.
2. Thorsten Wagner. (2016). ij-particlesizer: ParticleSizer 1.0.1. Zenodo. 10.5281/zenodo.56457 (<https://zenodo.org/badge/latestdoi/18649/thorstenwagner/ij-particlesizer>)
